# Supplementary material for: Changes in mean evapotranspiration dominate groundwater recharge in semi-arid regions
Source: Copernicus journal article supplement (doi:10.5194/egusphere-2024-433), 2024-04-08
Supplement: Supplementary file 2 [file egusphere-2024-433-supplement.zip]

Archive with 2 entries (2 files):
- All_Points_For_SI.csv
- SI_Figures.pdf
