# Supplementary material for: Changes in mean evapotranspiration dominate groundwater recharge in semi-arid regions
Source: Copernicus journal article supplement (doi:10.5194/egusphere-2024-433), 2024-04-08
Supplement: Supplementary file 2 [file egusphere-2024-433-supplement.zip › All_Points_For_SI.csv]

Lat	Long	Obs_Rechar	Sim_Rechar	YearlyRain	Bulk_Densi	Sand	Silt	Clay	θs	θr	α	n	Ks	Continents	WDT	HYGEO2	References
51.9	-107.3	3	2.350904	345.213206	1.002	37	34	29	0.087478	0.538655	0.011234	1.473564	81.75923	North America	-6.225681	Complex hydrogeological structure	Dyck MF, Kachanoski RG, de Jong E. Long-term movement of a chloride tracer under transient, semi-arid conditions. Soil Sci Soc Am J 2003, 67(2): 471-477.
52.1	-106.1	12	10.261692	390.163588	0.976	37	34	29	0.088279	0.546968	0.011329	1.470604	93.018583	North America	-9.155413	Complex hydrogeological structure	Joshi B. Estimation of diffuse vadose zone soil-water flux in a semi-arid region. 1997.
49.9	-112.8	11.6	6.547119	383.373309	1.369	33	41	26	0.074215	0.42782	0.008927	1.524149	12.494485	North America	-35.278859	Complex hydrogeological structure	Rodvang SJ, Mikalson DM, Ryan MC. Changes in ground water quality in an irrigated area of southern Alberta. J Environ Qual 2004, 33(2): 476-487.
37.3	-101.8	5	4.653932	454.898259	1.443	40	40	20	0.060894	0.393264	0.00983	1.514273	11.427228	North America	-9.689479	Major groundwater basins	McMahon PB, Dennehy KF, Bruce BW, Bohlke JK, Michel RL, Gurdak JJ, et al. Storage and transit time of chemicals in thick unsaturated zones under rangeland and irrigated cropland, High Plains, United States. Water Resour Res 2006, 42(3).
33.6	-102.8	17	15.091542	455.633195	1.537	71	12	17	0.05654	0.389888	0.027905	1.443763	35.162911	North America	-6.744488	Major groundwater basins	McMahon PB, Dennehy KF, Bruce BW, Bohlke JK, Michel RL, Gurdak JJ, et al. Storage and transit time of chemicals in thick unsaturated zones under rangeland and irrigated cropland, High Plains, United States. Water Resour Res 2006, 42(3).
33.8	-102.8	24.5	12.92722	455.633195	1.52	71	13	16	0.055254	0.393104	0.028257	1.46173	39.197984	North America	-5.584802	Major groundwater basins	McMahon PB, Dennehy KF, Bruce BW, Bohlke JK, Michel RL, Gurdak JJ, et al. Storage and transit time of chemicals in thick unsaturated zones under rangeland and irrigated cropland, High Plains, United States. Water Resour Res 2006, 42(3).
34.1	-102.8	0.2	7.423997	463.791253	1.473	66	18	16	0.054293	0.401648	0.02572	1.443058	37.158728	North America	-30.563821	Major groundwater basins	McMahon PB, Dennehy KF, Bruce BW, Bohlke JK, Michel RL, Gurdak JJ, et al. Storage and transit time of chemicals in thick unsaturated zones under rangeland and irrigated cropland, High Plains, United States. Water Resour Res 2006, 42(3).
37.07611	-100.68111	7	7.480067	542.26432	1.442	49	33	18	0.056458	0.394824	0.013916	1.466471	17.79531	North America	-7.278553	Major groundwater basins	McMahon, P. B., L. N. Plummer, J. K. Böhlke, S. D. Shapiro, and S. R. Hinkle. "A comparison of recharge rates in aquifers of the United States based on groundwater-age data." Hydrogeology Journal 19, no. 4 (2011): 779.
32.9	-102.1	19.5	14.650384	422.553273	1.542	68	17	15	0.051195	0.383138	0.028963	1.432289	32.057089	North America	-9.338521	Major groundwater basins	Scanlon BR. Evaluation of Moisture Flux from Chloride Data in Desert Soils. J Hydrol 1991, 128(1-4): 137-156.
34.3	-102.8	7	5.794101	463.791253	1.493	51	28	21	0.060329	0.394278	0.016607	1.41767	14.252126	North America	-24.277104	Major groundwater basins	Sophocleous M. Groundwater recharge and sustainability in the high plains aquifer in Kansas, USA. Hydrogeol J 2005, 13(2): 351-365.
38.9	-101.8	8	4.215226	454.307032	1.418	36	43	21	0.063985	0.400275	0.008429	1.544496	12.089594	North America	-7.049668	Major groundwater basins	Sophocleous M. Groundwater recharge and sustainability in the high plains aquifer in Kansas, USA. Hydrogeol J 2005, 13(2): 351-365.
38.1	-101.3	19	5.938371	483.76397	1.436	26	50	24	0.070622	0.407022	0.007094	1.570856	9.788545	North America	-15.060655	Major groundwater basins	Sophocleous M. Groundwater recharge and sustainability in the high plains aquifer in Kansas, USA. Hydrogeol J 2005, 13(2): 351-365.
34.6	-106.3	0.8	1.736045	395.497257	1.511	48	31	21	0.059781	0.387382	0.01518	1.423842	11.453271	North America	-103.440909	local and shallow aquifers	Stonestrom, D.A., Prudic, D. E., Walvoord, M. A., Abraham, J. D., Stewart-Deaker, A. E., Glancy, P. A., Constantz, J., Laczniak, R. J., Andraski, B.J., 2007. Focused ground-water recharge in the Amargosa Desert Basin. In: Stonestrom, D.A., Constantz, J.,
35.6	-105.8	0.3	3.469654	483.686345	1.301	48	34	18	0.059875	0.425252	0.011421	1.506708	29.709701	North America	-22.034028	local and shallow aquifers	Stonestrom, D.A., Prudic, D. E., Walvoord, M. A., Abraham, J. D., Stewart-Deaker, A. E., Glancy, P. A., Constantz, J., Laczniak, R. J., Andraski, B.J., 2007. Focused ground-water recharge in the Amargosa Desert Basin. In: Stonestrom, D.A., Constantz, J.,
31.4	-104.4	0.1	1.572702	350.335716	1.425	41	36	23	0.066584	0.407947	0.010919	1.488209	10.996439	North America	-41.107805	local and shallow aquifers	Walvoord MA, Phillips FM. Identifying areas of basin-floor recharge in the Trans-Pecos region and the link to vegetation. J Hydrol 2004, 292(1-4): 59-74.
38.3	-0.6	9.6	10.227783	315.281035	1.443	45	34	21	0.062198	0.400438	0.012369	1.471854	13.056716	Europe	-51.468681	Complex hydrogeological structure	Bellot J, Sanchez JR, Chirino E, Hernandez N, Abdelli F, Martinez JM. Effect of different vegetation type cover on the soil water balance in semi-arid areas of South Eastern Spain. Physics and Chemistry of the Earth, Part B: Hydrology, Oceans and Atmosph
35.6	-98.1	63.9	43.157066	753.177803	1.416	37	45	18	0.058343	0.390545	0.008014	1.561688	14.60983	North America	-6.912337	local and shallow aquifers	Daniel JA. Influence of wheat tillage practices on shallow groundwater recharge. J Soil Water Conserv 1999, 54(3): 560-564.
40.6	-102.3	2	2.155875	458.062951	1.446	41	40	19	0.058815	0.389811	0.01004	1.512866	12.207433	North America	-3.601129	Major groundwater basins	Sophocleous M. Groundwater recharge and sustainability in the high plains aquifer in Kansas, USA. Hydrogeol J 2005, 13(2): 351-365.
37.8	115.8	15.3	26.772703	561.349886	1.42	33	48	19	0.060961	0.392621	0.00716	1.582817	13.564042	Asia	-14.129854	Major groundwater basins	Wang BG, Jin MG, Nimmo JR, Yang L, Wang WF. Estimating groundwater recharge in Hebei Plain, China under varying land use practices using tritium and bromide tracers. J Hydrol 2008, 356(1-2): 209-222.
38.1	-98.8	42	32.141236	675.661115	1.42	55	31	14	0.049173	0.393928	0.017447	1.457354	30.664626	North America	-7.675288	Major groundwater basins	Sophocleous M, Mcallister JA. Basinwide Water-Balance Modeling with Emphasis on Spatial-Distribution of Ground-Water Recharge. Water Resour Bull 1987, 23(6): 997-1010.
35.8	-106.3	1	2.054551	415.728794	1.421	43	36	21	0.06301	0.403736	0.011124	1.493032	13.025067	North America	-182.467384	Major groundwater basins	Newman BD, Campbell AR, Wilcox BP. Tracer-based studies of soil water movement in semi-arid forests of New Mexico. J Hydrol 1997, 196(1-4): 251-270.
31.5	-109.9	0.7	0.88489	345.408739	1.428	47	23	30	0.076032	0.429609	0.016501	1.383171	13.386193	North America	-71.458	Major groundwater basins	Stonestrom, D.A., Prudic, D. E., Walvoord, M. A., Abraham, J. D., Stewart-Deaker, A. E., Glancy, P. A., Constantz, J., Laczniak, R. J., Andraski, B.J., 2007. Focused ground-water recharge in the Amargosa Desert Basin. In: Stonestrom, D.A., Constantz, J.,
31.8	-110.8	3	6.039903	428.436049	1.437	56	19	25	0.068832	0.422214	0.019323	1.391535	21.913113	North America	-69.504845	Major groundwater basins	Goodrich DC, Williams DG, Unkrich CL, Hogan JF, Scott RL, Hultine KR, et al. Comparison of methods to estimate ephemeral channel recharge, Walnut Gulch, San Pedro River basin, Arizona. Groundwater recharge in a desert environment: the southwestern United
32.11	-110.4	0.3	4.125634	396.130337	1.443	54	24	22	0.063715	0.411836	0.017683	1.418838	19.941821	North America	-135.149157	Major groundwater basins	Stonestrom, D.A., Prudic, D. E., Walvoord, M. A., Abraham, J. D., Stewart-Deaker, A. E., Glancy, P. A., Constantz, J., Laczniak, R. J., Andraski, B.J., 2007. Focused ground-water recharge in the Amargosa Desert Basin. In: Stonestrom, D.A., Constantz, J.,
29.1	-99.9	10.7	8.865084	521.270839	1.484	39	31	30	0.074869	0.411746	0.013416	1.404742	7.11869	North America	-18.677043	Complex hydrogeological structure	Holmstead GL, Knight RW, Hussey MA. Water-use and water yield of three C4 bunchgrasses in the South Texas plains. In Water yield improvement from rangeland watersheds Texas Water Dev Board, Austin 1988: 73-91.
31.43	-7.8	31.3	15.969662	400.580778	1.406	48	29	23	0.066478	0.417874	0.014048	1.450335	16.548641	Africa	-22.354467	Major groundwater basins	El Mekki, O. A., Laftouhi, N. E., & Hanich, L. Estimate of regional groundwater recharge rate in the Central Haouz Plain, Morocco, using the chloride mass balance method and a geographical information system. Applied Water Science, 1-10.
15.99	-16.31	10.8	31.232341	344.800009	1.527	77	9	14	0.055193	0.391101	0.02994	1.571243	59.049923	Africa	-17.090105	Major groundwater basins	Edmunds WM & Gaye CB (1994) Estimating the spatial variability of groundwater recharge in the Sahel using chloride, J. of Hydrol., 156; 47-59.
14.35	-3.61	20	37.535855	537.297651	1.528	68	15	17	0.055379	0.390714	0.027145	1.425792	31.442063	Africa	-10.955978	Major groundwater basins	Lapworth, D. J., MacDonald, A. M., et al. (2013). Residence times of shallow groundwater in West Africa: implications for hydrogeology and resilience to future changes in climate. Hydrogeology Journal, 21(3), 673-686.
-15.694	136.659	313.736	316.568606	1043.830419	1.422	73	11	16	0.058918	0.421842	0.02721	1.512904	63.407224	Australia	-7.049668	Complex hydrogeological structure	Crosbie, R. S., Jolly, I. D., Leaney, F. W., & Petheram, C. (2010). Can the dataset of field based recharge estimates in Australia be used to predict recharge in data-poor areas?. Hydrology and Earth System Sciences, 14(10),
-15.52	128.83	176.550437	185.797561	861.99032	1.443	72	10	18	0.061827	0.41879	0.025999	1.483063	52.345681	Australia	-2.517739	Complex hydrogeological structure	Crosbie, R. S., Jolly, I. D., Leaney, F. W., & Petheram, C. (2010). Can the dataset of field based recharge estimates in Australia be used to predict recharge in data-poor areas?. Hydrology and Earth System Sciences, 14(10),
-15.309	129.233	252.958723	248.565257	991.171583	1.464	72	11	17	0.05936	0.411175	0.026767	1.485774	49.804719	Australia	-8.728161	Complex hydrogeological structure	Crosbie, R. S., Jolly, I. D., Leaney, F. W., & Petheram, C. (2010). Can the dataset of field based recharge estimates in Australia be used to predict recharge in data-poor areas?. Hydrology and Earth System Sciences, 14(10),
-15.381	129.13	209.649231	222.962939	991.171583	1.484	75	10	15	0.056844	0.404095	0.028633	1.538971	58.585752	Australia	-16.54078	Major groundwater basins	Crosbie, R. S., Jolly, I. D., Leaney, F. W., & Petheram, C. (2010). Can the dataset of field based recharge estimates in Australia be used to predict recharge in data-poor areas?. Hydrology and Earth System Sciences, 14(10),
-19.457	144.318	23.27875	37.771977	585.133009	1.468	56	14	30	0.074337	0.423145	0.021148	1.332254	19.443024	Australia	-45.639734	Complex hydrogeological structure	Crosbie, R. S., Jolly, I. D., Leaney, F. W., & Petheram, C. (2010). Can the dataset of field based recharge estimates in Australia be used to predict recharge in data-poor areas?. Hydrology and Earth System Sciences, 14(10),
-19.226	142.997	42.464091	53.285182	599.438368	1.438	69	10	21	0.065836	0.423291	0.024337	1.435403	42.986674	Australia	-11.169604	Major groundwater basins	Crosbie, R. S., Jolly, I. D., Leaney, F. W., & Petheram, C. (2010). Can the dataset of field based recharge estimates in Australia be used to predict recharge in data-poor areas?. Hydrology and Earth System Sciences, 14(10),
-20.7	140.522	1.996193	13.601482	428.496895	1.472	55	14	31	0.075292	0.423229	0.021136	1.323514	18.299457	Australia	-17.410544	local and shallow aquifers	Crosbie, R. S., Jolly, I. D., Leaney, F. W., & Petheram, C. (2010). Can the dataset of field based recharge estimates in Australia be used to predict recharge in data-poor areas?. Hydrology and Earth System Sciences, 14(10),
-28.167	150.25	9.4	16.855914	611.217514	1.463	55	11	34	0.078998	0.430162	0.02237	1.298429	20.271547	Australia	-2.716106	Major groundwater basins	Crosbie, R. S., Jolly, I. D., Leaney, F. W., & Petheram, C. (2010). Can the dataset of field based recharge estimates in Australia be used to predict recharge in data-poor areas?. Hydrology and Earth System Sciences, 14(10),
-28.433	150.3	3.6	18.553318	611.217514	1.483	50	13	37	0.081328	0.427419	0.021856	1.279492	14.443385	Australia	-5.020218	Major groundwater basins	Crosbie, R. S., Jolly, I. D., Leaney, F. W., & Petheram, C. (2010). Can the dataset of field based recharge estimates in Australia be used to predict recharge in data-poor areas?. Hydrology and Earth System Sciences, 14(10),
-28.083	150.433	0.13	14.109185	611.217514	1.458	54	12	34	0.079235	0.431375	0.021892	1.303783	19.517056	Australia	-17.303731	Major groundwater basins	Crosbie, R. S., Jolly, I. D., Leaney, F. W., & Petheram, C. (2010). Can the dataset of field based recharge estimates in Australia be used to predict recharge in data-poor areas?. Hydrology and Earth System Sciences, 14(10),
-27	149.933	12.4	14.398785	615.41446	1.391	44	12	44	0.092248	0.461809	0.02201	1.279658	19.603772	Australia	0	Major groundwater basins	Crosbie, R. S., Jolly, I. D., Leaney, F. W., & Petheram, C. (2010). Can the dataset of field based recharge estimates in Australia be used to predict recharge in data-poor areas?. Hydrology and Earth System Sciences, 14(10),
-26	149.116	8	19.185464	617.899811	1.402	60	13	27	0.073391	0.438247	0.021334	1.378235	31.482143	Australia	-0.534066	Major groundwater basins	Crosbie, R. S., Jolly, I. D., Leaney, F. W., & Petheram, C. (2010). Can the dataset of field based recharge estimates in Australia be used to predict recharge in data-poor areas?. Hydrology and Earth System Sciences, 14(10),
-28.501	148.733	3	11.348678	533.479482	1.379	42	15	43	0.091946	0.463817	0.020533	1.298987	18.998637	Australia	-2.624552	Major groundwater basins	Crosbie, R. S., Jolly, I. D., Leaney, F. W., & Petheram, C. (2010). Can the dataset of field based recharge estimates in Australia be used to predict recharge in data-poor areas?. Hydrology and Earth System Sciences, 14(10),
-26.467	149.1	7.65	15.283959	607.088139	1.451	52	14	34	0.0796	0.432831	0.020929	1.313732	17.685422	Australia	-23.300526	Major groundwater basins	Crosbie, R. S., Jolly, I. D., Leaney, F. W., & Petheram, C. (2010). Can the dataset of field based recharge estimates in Australia be used to predict recharge in data-poor areas?. Hydrology and Earth System Sciences, 14(10),
-26.783	150.883	9.7	21.505626	653.635917	1.421	39	13	48	0.094131	0.456824	0.021725	1.260215	15.51463	Australia	-1.739528	Major groundwater basins	Crosbie, R. S., Jolly, I. D., Leaney, F. W., & Petheram, C. (2010). Can the dataset of field based recharge estimates in Australia be used to predict recharge in data-poor areas?. Hydrology and Earth System Sciences, 14(10),
-26.73	150.62	4	25.941501	653.635917	1.469	54	13	33	0.077654	0.426784	0.021524	1.30853	18.199327	Australia	-1.113909	Major groundwater basins	Crosbie, R. S., Jolly, I. D., Leaney, F. W., & Petheram, C. (2010). Can the dataset of field based recharge estimates in Australia be used to predict recharge in data-poor areas?. Hydrology and Earth System Sciences, 14(10),
-28.53	150.3	6	23.198061	634.949764	1.473	50	16	34	0.078715	0.426049	0.020211	1.311916	14.00919	Australia	-8.331426	Major groundwater basins	Crosbie, R. S., Jolly, I. D., Leaney, F. W., & Petheram, C. (2010). Can the dataset of field based recharge estimates in Australia be used to predict recharge in data-poor areas?. Hydrology and Earth System Sciences, 14(10),
-27.66984	150.34912	3.1	15.596637	607.902962	1.45	48	12	40	0.08589	0.440373	0.022133	1.275405	16.305984	Australia	-1.419089	Major groundwater basins	Crosbie, R. S., Jolly, I. D., Leaney, F. W., & Petheram, C. (2010). Can the dataset of field based recharge estimates in Australia be used to predict recharge in data-poor areas?. Hydrology and Earth System Sciences, 14(10),
-27.75926	150.36346	11.4	16.576077	607.902962	1.458	49	12	39	0.084514	0.436992	0.022161	1.276695	16.063362	Australia	-6.744488	Major groundwater basins	Crosbie, R. S., Jolly, I. D., Leaney, F. W., & Petheram, C. (2010). Can the dataset of field based recharge estimates in Australia be used to predict recharge in data-poor areas?. Hydrology and Earth System Sciences, 14(10),
-27.11622	150.01868	14	14.581713	612.90292	1.388	40	13	47	0.094807	0.465711	0.021655	1.27339	18.105982	Australia	-1.647974	Major groundwater basins	Crosbie, R. S., Jolly, I. D., Leaney, F. W., & Petheram, C. (2010). Can the dataset of field based recharge estimates in Australia be used to predict recharge in data-poor areas?. Hydrology and Earth System Sciences, 14(10),
-27.05563	149.97714	8	12.183411	599.491003	1.376	40	13	47	0.095297	0.469285	0.021658	1.276739	18.998488	Australia	-5.111772	Major groundwater basins	Crosbie, R. S., Jolly, I. D., Leaney, F. W., & Petheram, C. (2010). Can the dataset of field based recharge estimates in Australia be used to predict recharge in data-poor areas?. Hydrology and Earth System Sciences, 14(10),
-26.48	147.74	6	18.629415	550.19607	1.388	50	14	36	0.084437	0.453037	0.020619	1.325645	21.402146	Australia	-10.681315	Major groundwater basins	Crosbie, R. S., Jolly, I. D., Leaney, F. W., & Petheram, C. (2010). Can the dataset of field based recharge estimates in Australia be used to predict recharge in data-poor areas?. Hydrology and Earth System Sciences, 14(10),
-24.8	149.8	17.6	17.116693	637.291897	1.436	49	15	36	0.082532	0.439223	0.020408	1.312463	16.446046	Australia	-4.852369	Major groundwater basins	Silburn DM, Cowie BA, Thornton CM. The Brigalow Catchment Study revisited: Effects of land development on deep drainage determined from non-steady chloride profiles. J Hydrol 2009, 373(3-4): 487-498.
-30.3	149.3	31.3	20.900305	610.440174	1.388	44	17	39	0.087823	0.45593	0.019368	1.322365	17.817996	Australia	-2.746624	Major groundwater basins	Weaver TB, Hulugalle NR, Ghadiri H. Comparing deep drainage estimated with transient and steady state assumptions in irrigated vertisols. Irrigation Sci 2005, 23(4): 183-191.
-32.15	117.1	45	45.324221	396.510677	1.559	80	8	12	0.052943	0.379891	0.031776	1.66373	72.132678	Australia	-54.001678	local and shallow aquifers	Crosbie, R. S., Jolly, I. D., Leaney, F. W., & Petheram, C. (2010). Can the dataset of field based recharge estimates in Australia be used to predict recharge in data-poor areas?. Hydrology and Earth System Sciences, 14(10),
-32.44	117.56	15	19.275569	342.011538	1.573	79	8	13	0.053517	0.376653	0.031283	1.606232	59.989001	Australia	-23.315785	local and shallow aquifers	Crosbie, R. S., Jolly, I. D., Leaney, F. W., & Petheram, C. (2010). Can the dataset of field based recharge estimates in Australia be used to predict recharge in data-poor areas?. Hydrology and Earth System Sciences, 14(10),
-32.74	121.64	12	12.084208	409.913643	1.502	69	11	20	0.06207	0.403528	0.025367	1.4192	33.577149	Australia	-23.163195	local and shallow aquifers	Crosbie, R. S., Jolly, I. D., Leaney, F. W., & Petheram, C. (2010). Can the dataset of field based recharge estimates in Australia be used to predict recharge in data-poor areas?. Hydrology and Earth System Sciences, 14(10),
-31.73	118.17	10	10.840767	307.725454	1.587	78	8	14	0.05405	0.373379	0.030851	1.553859	49.993149	Australia	-9.689479	local and shallow aquifers	Crosbie, R. S., Jolly, I. D., Leaney, F. W., & Petheram, C. (2010). Can the dataset of field based recharge estimates in Australia be used to predict recharge in data-poor areas?. Hydrology and Earth System Sciences, 14(10),
-30.7	116.77	44	30.986542	361.977586	1.583	80	8	12	0.052223	0.372617	0.032274	1.646093	65.828813	Australia	-27.817197	local and shallow aquifers	Crosbie, R. S., Jolly, I. D., Leaney, F. W., & Petheram, C. (2010). Can the dataset of field based recharge estimates in Australia be used to predict recharge in data-poor areas?. Hydrology and Earth System Sciences, 14(10),
-33.86111	121.89194	25.2	25.406282	537.772746	1.414	65	17	18	0.059291	0.420464	0.023498	1.44326	42.11396	Australia	0	local and shallow aquifers	Crosbie, R. S., Jolly, I. D., Leaney, F. W., & Petheram, C. (2010). Can the dataset of field based recharge estimates in Australia be used to predict recharge in data-poor areas?. Hydrology and Earth System Sciences, 14(10),
-32.13333	117.16667	39.566667	43.147966	396.510677	1.553	79	8	13	0.054144	0.382704	0.030877	1.620316	64.806529	Australia	-46.738384	local and shallow aquifers	Crosbie, R. S., Jolly, I. D., Leaney, F. W., & Petheram, C. (2010). Can the dataset of field based recharge estimates in Australia be used to predict recharge in data-poor areas?. Hydrology and Earth System Sciences, 14(10),
-31.6	118.3	1.5	6.880478	307.725454	1.568	79	7	14	0.055565	0.379357	0.029995	1.593158	58.181876	Australia	-35.233082	local and shallow aquifers	George RJ, Frantom P. Preliminary groundwater and salinity investigations in the eastern wheatbelt: 3. Welbungin and Beacon River Catchments. Western Australian Department of Agriculture, Division of Resource Management, 1990.
-32.9	121.6	15	11.934988	409.913643	1.562	72	8	20	0.061256	0.386755	0.02664	1.404173	29.890128	Australia	-74.753948	local and shallow aquifers	Loh IC, Stokes RA. Predicting Stream Salinity Changes in South-Western Australia. In: Holmes JW, Talsma T (eds). Developments in Agricultural Engineering, vol. 2. Elsevier, 1981, pp 227-254.
-32.9	117.6	19	24.297293	369.998893	1.557	79	8	13	0.054022	0.381497	0.030953	1.61764	63.82599	Australia	-19.150072	local and shallow aquifers	Loh IC, Stokes RA. Predicting Stream Salinity Changes in South-Western Australia. In: Holmes JW, Talsma T (eds). Developments in Agricultural Engineering, vol. 2. Elsevier, 1981, pp 227-254.
-31.4	116.1	78	72.881348	497.653448	1.413	73	11	16	0.059088	0.424333	0.027162	1.513504	65.475777	Australia	-21.83566	local and shallow aquifers	Peck AJ, Hurle DH. Chloride Balance of Some Farmed and Forested Catchments in Southwestern Australia. Water Resour Res 1973, 9(3): 648-657.
-33.9	121.8	35	23.966702	537.772746	1.299	71	13	16	0.059588	0.453148	0.026347	1.481225	87.650448	Australia	0	local and shallow aquifers	Smettem KRJ. Deep drainage and nitrate losses under native vegetation and agricultural systems in the Mediterranean climate region of Australia. CSIRO Land and Water Resour Res and Dev, Canberra, ACT, Australia 1998.
-22.4	26.72	12	23.29981	433.486859	1.561	61	15	24	0.063105	0.389548	0.023735	1.330165	16.18549	Africa	-59.449149	Complex hydrogeological structure	Magombedze, L.M.; Lubczynski , M.W.; Frengstad, B.. 2004 Spatial variation of groundwater recharge in semi-arid environment - Serowe, Botswana. Water Resources of Arid Areas, pp 97-104
-24.1	25.1	9.8	28.224684	434.542166	1.568	80	9	11	0.050808	0.375837	0.033285	1.675601	73.403901	Africa	-17.578393	Complex hydrogeological structure	Selaolo E, Beekman H, Gieske A, De Vries J. Multiple tracer profiling in Botswana: GRES findings. 2003.
-24.2	29.06	13.1	16.384962	565.350723	1.501	62	17	21	0.06131	0.401467	0.022919	1.390514	23.671544	Africa	-75.181201	Major groundwater basins	Wang, Lei, Brighid O Dochartaigh, and David Macdonald. "A literature review of recharge estimation and groundwater resource assessment in Africa." (2010).
-23.67	29.56	48	39.292418	597.160253	1.473	53	17	30	0.074052	0.420549	0.019843	1.339587	15.914454	Africa	-31.815061	Major groundwater basins	Xu&Beekman, (2003) A box model for estimating recharge, in Xu&Beekman (eds) GW recharge estimation in Southern Africa, UNESCO, Paris.
-36	143.5	1	4.127169	364.260345	1.541	57	10	33	0.074148	0.406373	0.023841	1.264177	15.402487	Australia	-3.814755	Complex hydrogeological structure	Crosbie, R. S., Jolly, I. D., Leaney, F. W., & Petheram, C. (2010). Can the dataset of field based recharge estimates in Australia be used to predict recharge in data-poor areas?. Hydrology and Earth System Sciences, 14(10),
-36.33	144.95	0.75	13.144346	451.793105	1.46	57	19	24	0.066648	0.41482	0.01993	1.388894	21.073251	Australia	-25.329976	Complex hydrogeological structure	Crosbie, R. S., Jolly, I. D., Leaney, F. W., & Petheram, C. (2010). Can the dataset of field based recharge estimates in Australia be used to predict recharge in data-poor areas?. Hydrology and Earth System Sciences, 14(10),
-35.31472	138.7733	32	55.974122	537.96552	1.297	73	12	15	0.058501	0.453904	0.027718	1.502308	98.971373	Australia	-29.694057	Complex hydrogeological structure	Crosbie, R. S., Jolly, I. D., Leaney, F. W., & Petheram, C. (2010). Can the dataset of field based recharge estimates in Australia be used to predict recharge in data-poor areas?. Hydrology and Earth System Sciences, 14(10),
-33.61116	138.87379	15	36.379325	476.886207	1.518	61	14	25	0.066448	0.40323	0.022798	1.346325	19.629206	Australia	-90.63859	Complex hydrogeological structure	Crosbie, R. S., Jolly, I. D., Leaney, F. W., & Petheram, C. (2010). Can the dataset of field based recharge estimates in Australia be used to predict recharge in data-poor areas?. Hydrology and Earth System Sciences, 14(10),
-34.6644	139.086	16	23.040818	411.777587	1.383	74	11	15	0.058112	0.431552	0.027947	1.532177	78.996934	Australia	-80.598154	Complex hydrogeological structure	Crosbie, R. S., Jolly, I. D., Leaney, F. W., & Petheram, C. (2010). Can the dataset of field based recharge estimates in Australia be used to predict recharge in data-poor areas?. Hydrology and Earth System Sciences, 14(10),
-34.87782	138.94557	23.25	32.832813	493.313795	1.186	72	12	16	0.061166	0.485784	0.027165	1.458525	127.305461	Australia	-129.533837	Complex hydrogeological structure	Crosbie, R. S., Jolly, I. D., Leaney, F. W., & Petheram, C. (2010). Can the dataset of field based recharge estimates in Australia be used to predict recharge in data-poor areas?. Hydrology and Earth System Sciences, 14(10),
-34.89552	138.69812	40.97	35.233843	493.313795	1.291	66	17	17	0.059807	0.450911	0.023239	1.452101	71.321389	Australia	-39.414054	Complex hydrogeological structure	Crosbie, R. S., Jolly, I. D., Leaney, F. W., & Petheram, C. (2010). Can the dataset of field based recharge estimates in Australia be used to predict recharge in data-poor areas?. Hydrology and Earth System Sciences, 14(10),
-34.92342	138.68689	16.16	35.087945	493.313795	1.278	68	16	16	0.05857	0.454499	0.024668	1.459367	83.059721	Australia	-51.667048	Complex hydrogeological structure	Crosbie, R. S., Jolly, I. D., Leaney, F. W., & Petheram, C. (2010). Can the dataset of field based recharge estimates in Australia be used to predict recharge in data-poor areas?. Hydrology and Earth System Sciences, 14(10),
-34.86608	138.71765	15.56	33.025722	493.313795	1.271	69	16	15	0.056903	0.455083	0.025603	1.464555	91.027565	Australia	-2.410925	Complex hydrogeological structure	Crosbie, R. S., Jolly, I. D., Leaney, F. W., & Petheram, C. (2010). Can the dataset of field based recharge estimates in Australia be used to predict recharge in data-poor areas?. Hydrology and Earth System Sciences, 14(10),
-34.89549	138.75169	50.29	39.117605	493.313795	1.181	72	14	14	0.056878	0.481603	0.027915	1.459409	136.708473	Australia	-60.68513	Complex hydrogeological structure	Crosbie, R. S., Jolly, I. D., Leaney, F. W., & Petheram, C. (2010). Can the dataset of field based recharge estimates in Australia be used to predict recharge in data-poor areas?. Hydrology and Earth System Sciences, 14(10),
-34.93069	138.7257	38.91	32.985648	493.313795	1.154	71	14	15	0.058917	0.490357	0.026877	1.44468	138.120133	Australia	-116.044862	Complex hydrogeological structure	Crosbie, R. S., Jolly, I. D., Leaney, F. W., & Petheram, C. (2010). Can the dataset of field based recharge estimates in Australia be used to predict recharge in data-poor areas?. Hydrology and Earth System Sciences, 14(10),
-34.92824	138.70427	42.43	35.683881	493.313795	1.212	71	14	15	0.058338	0.474187	0.026804	1.461547	117.589559	Australia	-12.512398	Complex hydrogeological structure	Crosbie, R. S., Jolly, I. D., Leaney, F. W., & Petheram, C. (2010). Can the dataset of field based recharge estimates in Australia be used to predict recharge in data-poor areas?. Hydrology and Earth System Sciences, 14(10),
-34.9295	138.67022	23.76	32.309925	493.313795	1.334	65	18	17	0.058831	0.438406	0.022917	1.452231	58.619608	Australia	-45.136187	Complex hydrogeological structure	Crosbie, R. S., Jolly, I. D., Leaney, F. W., & Petheram, C. (2010). Can the dataset of field based recharge estimates in Australia be used to predict recharge in data-poor areas?. Hydrology and Earth System Sciences, 14(10),
-34.88688	138.70655	30.03	34.250391	493.313795	1.264	67	17	16	0.058412	0.456649	0.023946	1.45371	83.662261	Australia	-22.186618	Complex hydrogeological structure	Crosbie, R. S., Jolly, I. D., Leaney, F. W., & Petheram, C. (2010). Can the dataset of field based recharge estimates in Australia be used to predict recharge in data-poor areas?. Hydrology and Earth System Sciences, 14(10),
-34.94562	138.67166	35.03	34.782167	493.313795	1.269	67	17	16	0.058346	0.455337	0.023972	1.454445	82.270869	Australia	-2.761883	Complex hydrogeological structure	Crosbie, R. S., Jolly, I. D., Leaney, F. W., & Petheram, C. (2010). Can the dataset of field based recharge estimates in Australia be used to predict recharge in data-poor areas?. Hydrology and Earth System Sciences, 14(10),
-34.87414	138.67538	24.91	33.968871	493.313795	1.423	66	15	19	0.061355	0.42136	0.023786	1.439755	41.471489	Australia	-7.690547	Complex hydrogeological structure	Crosbie, R. S., Jolly, I. D., Leaney, F. W., & Petheram, C. (2010). Can the dataset of field based recharge estimates in Australia be used to predict recharge in data-poor areas?. Hydrology and Earth System Sciences, 14(10),
-34.88209	138.7018	40.05	38.175173	493.313795	1.305	66	17	17	0.0596	0.44727	0.023322	1.453319	67.895296	Australia	-28.107118	Complex hydrogeological structure	Crosbie, R. S., Jolly, I. D., Leaney, F. W., & Petheram, C. (2010). Can the dataset of field based recharge estimates in Australia be used to predict recharge in data-poor areas?. Hydrology and Earth System Sciences, 14(10),
-34.8493	138.72587	22.35	37.323073	493.313795	1.271	72	14	14	0.056047	0.456965	0.027872	1.486961	105.880114	Australia	-121.263447	Complex hydrogeological structure	Crosbie, R. S., Jolly, I. D., Leaney, F. W., & Petheram, C. (2010). Can the dataset of field based recharge estimates in Australia be used to predict recharge in data-poor areas?. Hydrology and Earth System Sciences, 14(10),
-34.9428	138.91198	46.02	40.5999	493.313795	1.277	71	13	16	0.059832	0.459109	0.026355	1.476571	93.994979	Australia	-86.4271	Complex hydrogeological structure	Crosbie, R. S., Jolly, I. D., Leaney, F. W., & Petheram, C. (2010). Can the dataset of field based recharge estimates in Australia be used to predict recharge in data-poor areas?. Hydrology and Earth System Sciences, 14(10),
-34.94305	138.90875	36.84	37.345539	493.313795	1.277	71	13	16	0.059832	0.459109	0.026355	1.476571	93.994979	Australia	-86.4271	Complex hydrogeological structure	Crosbie, R. S., Jolly, I. D., Leaney, F. W., & Petheram, C. (2010). Can the dataset of field based recharge estimates in Australia be used to predict recharge in data-poor areas?. Hydrology and Earth System Sciences, 14(10),
-34.85986	138.95798	18.54	42.236793	493.313795	1.241	73	12	15	0.059002	0.469299	0.027889	1.485604	116.639473	Australia	-110.368505	Complex hydrogeological structure	Crosbie, R. S., Jolly, I. D., Leaney, F. W., & Petheram, C. (2010). Can the dataset of field based recharge estimates in Australia be used to predict recharge in data-poor areas?. Hydrology and Earth System Sciences, 14(10),
-34.6	142.8	7	4.668859	320.279311	1.556	63	14	23	0.062378	0.39017	0.024353	1.34247	18.516867	Australia	-0.076295	Complex hydrogeological structure	Cook PG, Walker GR, Jolly ID. Spatial variability of groundwater recharge in a semiarid region. J Hydrol 1989, 111(1): 195-212.
-34.8897	138.67745	21.27	36.760078	493.313795	1.439	67	14	19	0.061343	0.417966	0.024341	1.440323	40.737014	Australia	-16.952773	Complex hydrogeological structure	Crosbie, R. S., Jolly, I. D., Leaney, F. W., & Petheram, C. (2010). Can the dataset of field based recharge estimates in Australia be used to predict recharge in data-poor areas?. Hydrology and Earth System Sciences, 14(10),
-34.6	143.6	8.3	4.440561	337.737931	1.57	59	10	31	0.070691	0.395651	0.024436	1.262084	14.152643	Australia	-10.742351	Complex hydrogeological structure	Cook PG, Walker GR, Jolly ID. Spatial variability of groundwater recharge in a semiarid region. J Hydrol 1989, 111(1): 195-212.
-34.93937	138.67433	23.64	32.491963	493.313795	1.302	65	18	17	0.059344	0.446607	0.022664	1.450854	65.816923	Australia	-46.1738	Complex hydrogeological structure	Crosbie, R. S., Jolly, I. D., Leaney, F. W., & Petheram, C. (2010). Can the dataset of field based recharge estimates in Australia be used to predict recharge in data-poor areas?. Hydrology and Earth System Sciences, 14(10),
-34.9296	138.65321	26.87	35.445095	493.313795	1.392	67	17	16	0.056458	0.423561	0.02494	1.461907	53.179511	Australia	-23.86511	Complex hydrogeological structure	Crosbie, R. S., Jolly, I. D., Leaney, F. W., & Petheram, C. (2010). Can the dataset of field based recharge estimates in Australia be used to predict recharge in data-poor areas?. Hydrology and Earth System Sciences, 14(10),
-34.90482	138.65491	25.25	43.354271	493.313795	1.474	70	13	17	0.05799	0.406975	0.026557	1.463364	43.28929	Australia	-19.897765	Complex hydrogeological structure	Crosbie, R. S., Jolly, I. D., Leaney, F. W., & Petheram, C. (2010). Can the dataset of field based recharge estimates in Australia be used to predict recharge in data-poor areas?. Hydrology and Earth System Sciences, 14(10),
-34.94304	138.90875	37.06	35.814238	493.313795	1.277	71	13	16	0.059832	0.459109	0.026355	1.476571	93.994979	Australia	-86.4271	Complex hydrogeological structure	Crosbie, R. S., Jolly, I. D., Leaney, F. W., & Petheram, C. (2010). Can the dataset of field based recharge estimates in Australia be used to predict recharge in data-poor areas?. Hydrology and Earth System Sciences, 14(10),
-35.31436	138.74954	48	52.408179	537.96552	1.27	73	12	15	0.058751	0.461299	0.027787	1.494652	107.2908	Australia	-29.922942	Complex hydrogeological structure	Crosbie, R. S., Jolly, I. D., Leaney, F. W., & Petheram, C. (2010). Can the dataset of field based recharge estimates in Australia be used to predict recharge in data-poor areas?. Hydrology and Earth System Sciences, 14(10),
-35.26707	138.80259	66	58.674266	537.96552	1.349	72	12	16	0.059499	0.440843	0.026754	1.498802	77.746423	Australia	-155.352102	Complex hydrogeological structure	Crosbie, R. S., Jolly, I. D., Leaney, F. W., & Petheram, C. (2010). Can the dataset of field based recharge estimates in Australia be used to predict recharge in data-poor areas?. Hydrology and Earth System Sciences, 14(10),
-35.35125	139.00721	3	12.318436	410.293105	1.383	73	8	19	0.065662	0.438218	0.025478	1.493914	66.841668	Australia	-7.431144	Complex hydrogeological structure	Crosbie, R. S., Jolly, I. D., Leaney, F. W., & Petheram, C. (2010). Can the dataset of field based recharge estimates in Australia be used to predict recharge in data-poor areas?. Hydrology and Earth System Sciences, 14(10),
-36.44	145.17	36	26.858068	481.853448	1.499	58	20	22	0.062242	0.401149	0.020904	1.385953	19.281133	Australia	-29.098955	Complex hydrogeological structure	Crosbie, R. S., Jolly, I. D., Leaney, F. W., & Petheram, C. (2010). Can the dataset of field based recharge estimates in Australia be used to predict recharge in data-poor areas?. Hydrology and Earth System Sciences, 14(10),
-34.63	143.56	6	6.050808	337.737931	1.639	62	11	27	0.063042	0.370949	0.026478	1.253735	11.066341	Australia	-6.576638	Complex hydrogeological structure	Crosbie, R. S., Jolly, I. D., Leaney, F. W., & Petheram, C. (2010). Can the dataset of field based recharge estimates in Australia be used to predict recharge in data-poor areas?. Hydrology and Earth System Sciences, 14(10),
-34.57	142.75	4	4.053127	320.279311	1.593	66	10	24	0.062836	0.381306	0.025933	1.312087	17.436437	Australia	-4.669261	Complex hydrogeological structure	Crosbie, R. S., Jolly, I. D., Leaney, F. W., & Petheram, C. (2010). Can the dataset of field based recharge estimates in Australia be used to predict recharge in data-poor areas?. Hydrology and Earth System Sciences, 14(10),
-36.35	142.25	7	6.96962	380.006897	1.476	59	8	33	0.077483	0.425759	0.023573	1.291929	23.250237	Australia	-12.405585	Complex hydrogeological structure	Crosbie, R. S., Jolly, I. D., Leaney, F. W., & Petheram, C. (2010). Can the dataset of field based recharge estimates in Australia be used to predict recharge in data-poor areas?. Hydrology and Earth System Sciences, 14(10),
-35.1	147.37	78	82.099443	607.927587	1.492	57	20	23	0.063958	0.404361	0.02032	1.383206	18.560504	Australia	-0.793469	Complex hydrogeological structure	Crosbie, R. S., Jolly, I. D., Leaney, F. W., & Petheram, C. (2010). Can the dataset of field based recharge estimates in Australia be used to predict recharge in data-poor areas?. Hydrology and Earth System Sciences, 14(10),
-33.83	138.61	50	51.372328	476.886207	1.385	72	13	15	0.056867	0.428888	0.027494	1.506107	71.012204	Australia	-36.591135	Complex hydrogeological structure	Crosbie, R. S., Jolly, I. D., Leaney, F. W., & Petheram, C. (2010). Can the dataset of field based recharge estimates in Australia be used to predict recharge in data-poor areas?. Hydrology and Earth System Sciences, 14(10),
-33.39604	147.78001	12	16.877079	520.574139	1.516	57	19	24	0.064529	0.400048	0.020902	1.362627	16.420397	Australia	-1.892119	Complex hydrogeological structure	Crosbie, R. S., Jolly, I. D., Leaney, F. W., & Petheram, C. (2010). Can the dataset of field based recharge estimates in Australia be used to predict recharge in data-poor areas?. Hydrology and Earth System Sciences, 14(10),
-34.03387	147.93091	12.875	32.365197	549.379311	1.548	60	17	23	0.062104	0.391165	0.022992	1.348234	16.700949	Australia	-17.807279	Complex hydrogeological structure	Crosbie, R. S., Jolly, I. D., Leaney, F. W., & Petheram, C. (2010). Can the dataset of field based recharge estimates in Australia be used to predict recharge in data-poor areas?. Hydrology and Earth System Sciences, 14(10),
-34.0395	147.93143	36.903409	39.023306	549.379311	1.53	60	17	23	0.062891	0.396112	0.022554	1.358883	18.147975	Australia	-17.807279	Complex hydrogeological structure	Crosbie, R. S., Jolly, I. D., Leaney, F. W., & Petheram, C. (2010). Can the dataset of field based recharge estimates in Australia be used to predict recharge in data-poor areas?. Hydrology and Earth System Sciences, 14(10),
-33.28251	147.33756	7.642023	11.986491	466.474138	1.552	64	13	23	0.062829	0.391649	0.024558	1.345706	19.770268	Australia	-20.065614	Complex hydrogeological structure	Crosbie, R. S., Jolly, I. D., Leaney, F. W., & Petheram, C. (2010). Can the dataset of field based recharge estimates in Australia be used to predict recharge in data-poor areas?. Hydrology and Earth System Sciences, 14(10),
-36.6	143.9	58.8	44.97567	510.387932	1.499	62	15	23	0.064569	0.405692	0.022751	1.374736	23.005923	Australia	-6.439307	Complex hydrogeological structure	Unkovich M, Blott K, Knight A, Mock I, Rab A, Portelli M. Water use, competition, and crop production in low rainfall, alley farming systems of south-eastern Australia. Aust J Agr Res 2003, 54(8): 751-762.
-24.4	25.6	10	16.371892	451.235541	1.583	71	14	15	0.051261	0.373618	0.030932	1.433314	31.367009	Africa	-93.278401	local and shallow aquifers	Gieske ASM. Dynamics of groundwater recharge: a case study in semi-arid eastern Botswana. 1992.
-25.3	25.6	16	36.388577	508.297242	1.523	79	10	11	0.051069	0.388687	0.032885	1.666828	79.715687	Africa	-32.272831	local and shallow aquifers	Selaolo E, Beekman H, Gieske A, De Vries J. Multiple tracer profiling in Botswana: GRES findings. 2003.
-29.56	26.68	21.3	16.805357	578.441528	1.481	66	14	20	0.061531	0.407717	0.024287	1.41504	31.872615	Africa	-14.526589	local and shallow aquifers	Wang, Lei, Brighid O Dochartaigh, and David Macdonald. "A literature review of recharge estimation and groundwater resource assessment in Africa." (2010).
-29.67	26.25	38.1	25.415438	520.80666	1.492	60	16	24	0.065923	0.408266	0.021841	1.370113	21.278597	Africa	-33.554589	local and shallow aquifers	Wang, Lei, Brighid O Dochartaigh, and David Macdonald. "A literature review of recharge estimation and groundwater resource assessment in Africa." (2010).
-30.03	25.8	25.2	20.247718	475.875324	1.506	60	16	24	0.065365	0.404445	0.022091	1.363058	19.963774	Africa	-22.30869	local and shallow aquifers	Wang, Lei, Brighid O Dochartaigh, and David Macdonald. "A literature review of recharge estimation and groundwater resource assessment in Africa." (2010).
-25.15	25.67	18	23.64998	508.297242	1.531	62	17	21	0.060163	0.393368	0.023588	1.374838	20.723629	Africa	-102.296483	local and shallow aquifers	Gieske, Selaolo & McMullan (1990) Groundwater recharge through the unsaturated zone of southeastern Botswana: a study of chlorides and enviornmental isotopes, Regionalisation in Hydrology, Proceedings of the Ljubljana Symposium, April 1990, IAHS Publ,191
-29.57	26.69	13	28.464948	578.441528	1.524	66	13	21	0.061643	0.397424	0.024824	1.385322	25.772251	Africa	-26.565957	local and shallow aquifers	Van Tonder GJ & Kirchner J (1990) Estimation of natural groundwater recharge in the Karoo Aquifers of South Africa, J. of Hydrol., 121, 395-419.
-26.65	24.89	9.6	27.823626	474.358804	1.557	76	9	15	0.055374	0.383174	0.029725	1.520078	46.931827	Africa	-30.518044	local and shallow aquifers	van Wyk E. 2010. Estimation of episodic groundwater recharge in semi-arid fractured hard rock aquifers, PhD Thesis, University of Free State, South Africa, August 2010.
-24.3	29.9	11.5	25.286825	622.05672	1.438	54	20	26	0.070129	0.422668	0.018579	1.388416	19.43828	Africa	-89.127947	Complex hydrogeological structure	Külls C, Adar EM, Udluft P. Resolving patterns of groundwater flow by inverse hydrochemical modelling in a semiarid Kalahari basin. Tracers and Modelling in Hydrogeology 2000(262): 447-451.
-25.88	25.88	47.8	30.152153	567.109444	1.557	69	11	20	0.059899	0.387591	0.026489	1.387233	26.283404	Africa	-51.682307	Major groundwater basins	Wang, Lei, Brighid O Dochartaigh, and David Macdonald. "A literature review of recharge estimation and groundwater resource assessment in Africa." (2010).
-25.83	28.13	74.3	50.075131	666.432538	1.472	56	17	27	0.070408	0.416935	0.020263	1.359479	18.666197	Africa	-0.091554	Major groundwater basins	Wang, Lei, Brighid O Dochartaigh, and David Macdonald. "A literature review of recharge estimation and groundwater resource assessment in Africa." (2010).
-26.85	24.23	12	29.023706	453.085008	1.581	82	6	12	0.054188	0.37357	0.031032	1.718832	79.046712	Africa	-60.028992	Major groundwater basins	Wang, Lei, Brighid O Dochartaigh, and David Macdonald. "A literature review of recharge estimation and groundwater resource assessment in Africa." (2010).
-30.65	24	16.4	3.180484	318.461485	1.543	60	18	22	0.060818	0.390768	0.022898	1.359906	17.452298	Africa	-27.069505	Major groundwater basins	Wang, Lei, Brighid O Dochartaigh, and David Macdonald. "A literature review of recharge estimation and groundwater resource assessment in Africa." (2010).
-32.67	26.1	36.2	26.650419	580.655012	1.333	52	21	27	0.074659	0.450519	0.017037	1.414402	26.859313	Africa	-189.944305	Major groundwater basins	Wang, Lei, Brighid O Dochartaigh, and David Macdonald. "A literature review of recharge estimation and groundwater resource assessment in Africa." (2010).
-32.28	24.62	21.9	5.100905	366.527851	1.485	62	20	18	0.056532	0.399232	0.023152	1.417338	27.541378	Africa	-180.453193	Major groundwater basins	Wang, Lei, Brighid O Dochartaigh, and David Macdonald. "A literature review of recharge estimation and groundwater resource assessment in Africa." (2010).
-29.8	115.6	35.9	37.345464	410.317129	1.566	77	7	16	0.057674	0.381866	0.028647	1.518461	46.17123	Australia	-53.162432	Major groundwater basins	Bekele EB, Salama RB, Commander DP. Impact of change in vegetation cover on groundwater recharge to a phreatic aquifer in Western Australia: assessment of several recharge estimation techniques. Aust J Earth Sci 2006, 53(6): 905-917.
-29.19	115.44	17.16	34.059104	410.24939	1.491	73	11	16	0.057293	0.402515	0.027898	1.497234	48.980932	Australia	-32.272831	Major groundwater basins	Crosbie, R. S., Jolly, I. D., Leaney, F. W., & Petheram, C. (2010). Can the dataset of field based recharge estimates in Australia be used to predict recharge in data-poor areas?. Hydrology and Earth System Sciences, 14(10),
-31.6	115.81	134	139.559623	656.751724	1.524	75	9	16	0.057636	0.393959	0.028331	1.510764	48.23139	Australia	-12.924392	Major groundwater basins	Crosbie, R. S., Jolly, I. D., Leaney, F. W., & Petheram, C. (2010). Can the dataset of field based recharge estimates in Australia be used to predict recharge in data-poor areas?. Hydrology and Earth System Sciences, 14(10),
-31.8	115.9	121	136.608674	656.751724	1.568	75	10	15	0.054264	0.379587	0.030207	1.495395	42.08474	Australia	-14.892805	Major groundwater basins	Allen A. Groundwater resources of the Swan coastal plain, near Perth, Western Australia. Groundwater Resources of the Swan Coastal Plain 1981: 29-74.
-31.5	115.78	98	107.28117	569.477586	1.406	78	11	11	0.052137	0.420931	0.03221	1.640719	108.122735	Australia	-2.944991	Major groundwater basins	Crosbie, R. S., Jolly, I. D., Leaney, F. W., & Petheram, C. (2010). Can the dataset of field based recharge estimates in Australia be used to predict recharge in data-poor areas?. Hydrology and Earth System Sciences, 14(10),
-31.48	115.8	129	129.445659	569.477586	1.497	81	9	10	0.051427	0.395726	0.033085	1.762893	107.280447	Australia	-9.491112	Major groundwater basins	Crosbie, R. S., Jolly, I. D., Leaney, F. W., & Petheram, C. (2010). Can the dataset of field based recharge estimates in Australia be used to predict recharge in data-poor areas?. Hydrology and Earth System Sciences, 14(10),
-31.69	115.9	157.7	157.445579	656.751724	1.521	78	10	12	0.052235	0.390335	0.031894	1.624457	71.036581	Australia	-19.439994	Major groundwater basins	Crosbie, R. S., Jolly, I. D., Leaney, F. W., & Petheram, C. (2010). Can the dataset of field based recharge estimates in Australia be used to predict recharge in data-poor areas?. Hydrology and Earth System Sciences, 14(10),
-31.48	115.7	131.4	105.470596	569.477586	1.512	74	12	14	0.053439	0.393845	0.03006	1.521274	51.755293	Australia	-12.191958	Major groundwater basins	Crosbie, R. S., Jolly, I. D., Leaney, F. W., & Petheram, C. (2010). Can the dataset of field based recharge estimates in Australia be used to predict recharge in data-poor areas?. Hydrology and Earth System Sciences, 14(10),
-33.6	-65.8	6.9	6.824104	602.425862	1.404	51	21	28	0.074023	0.433818	0.017408	1.392759	18.841977	South America	-1.297017	Major groundwater basins	Santoni CS, Jobbagy EG, Contreras S. Vadose zone transport in dry forests of central Argentina: Role of land use. Water Resour Res 2010, 46.
-33.8	-65.8	9.6	7.988734	602.425862	1.385	64	15	21	0.065266	0.433884	0.022286	1.429061	42.287471	South America	-6.851301	Major groundwater basins	Santoni CS, Jobbagy EG, Contreras S. Vadose zone transport in dry forests of central Argentina: Role of land use. Water Resour Res 2010, 46.
-33.4	-65.9	13.2	13.624271	617.751725	1.435	49	23	28	0.073027	0.424507	0.01669	1.391019	14.591239	South America	-8.133059	Major groundwater basins	Santoni CS, Jobbagy EG, Contreras S. Vadose zone transport in dry forests of central Argentina: Role of land use. Water Resour Res 2010, 46.
-33.4	-66.6	0.02	3.052354	502.481034	1.408	60	20	20	0.061901	0.421481	0.020472	1.428583	32.549485	South America	-6.836042	Major groundwater basins	Santoni CS, Jobbagy EG, Contreras S. Vadose zone transport in dry forests of central Argentina: Role of land use. Water Resour Res 2010, 46.
-33.439	-66.538	0.02	3.564863	502.481034	1.419	64	19	17	0.056889	0.415613	0.023317	1.443934	40.618947	South America	-9.445335	Major groundwater basins	Santoni CS, Jobbagy EG, Contreras S. Vadose zone transport in dry forests of central Argentina: Role of land use. Water Resour Res 2010, 46.
-33.419	-65.94	13.2	12.193172	617.751725	1.389	51	24	25	0.070078	0.430296	0.016153	1.423565	20.268836	South America	-3.982605	Major groundwater basins	Santoni CS, Jobbagy EG, Contreras S. Vadose zone transport in dry forests of central Argentina: Role of land use. Water Resour Res 2010, 46.
-33.505	-65.772	6.9	6.502918	602.425862	1.394	54	19	27	0.072987	0.436305	0.018469	1.393735	23.496206	South America	-18.829633	Major groundwater basins	Santoni CS, Jobbagy EG, Contreras S. Vadose zone transport in dry forests of central Argentina: Role of land use. Water Resour Res 2010, 46.
-33.584	-65.839	10.8	11.622873	602.425862	1.401	51	20	29	0.075486	0.436817	0.017794	1.384314	19.154899	South America	-10.29984	Major groundwater basins	Santoni CS, Jobbagy EG, Contreras S. Vadose zone transport in dry forests of central Argentina: Role of land use. Water Resour Res 2010, 46.
-34.4	135.9	10	18.752118	422.177341	1.375	73	12	15	0.057598	0.432689	0.027723	1.517522	77.150795	Australia	-40.848402	local and shallow aquifers	Richardson SB, Narayan KA. The effectiveness of management options for dryland salinity control at Wanilla, South Australia. Agr Water Manage 1995, 29(1): 63-83.
-32.4	18.8	15	16.798011	323.518193	1.459	68	18	14	0.051436	0.402701	0.02763	1.466811	46.358178	Africa	-21.545739	Complex hydrogeological structure	Conrad J, Nel J, Wentzel J. The challenges and implications of assessing groundwater recharge: A case study–northern Sandveld, Western Cape, South Africa. Water Sa 2004, 30(5): 75-81.
-34.52	20.12	22	24.955291	503.843027	1.453	67	16	17	0.057157	0.410072	0.025298	1.448698	40.760262	Africa	-0.823987	Complex hydrogeological structure	Wang, Lei, Brighid O Dochartaigh, and David Macdonald. "A literature review of recharge estimation and groundwater resource assessment in Africa." (2010).
-33.68	19.85	47.7	48.409125	466.701555	1.506	64	18	18	0.056445	0.395598	0.024635	1.412393	27.64838	Africa	-30.334936	Complex hydrogeological structure	Wang, Lei, Brighid O Dochartaigh, and David Macdonald. "A literature review of recharge estimation and groundwater resource assessment in Africa." (2010).
-32.2	18.48	3.5	4.400431	209.124949	1.532	76	10	14	0.054277	0.389193	0.030247	1.547694	54.214501	Africa	-32.043946	Complex hydrogeological structure	Conrad J, Nel J, Wentzel J. 2004. the challenges and implications of assessing groundwater recharge: A case study - northern Sandveld, Western Cape, S Africa, Water SA, 30;5, 75-83.
-32.85521	134.28428	11	5.069587	344.082066	1.483	68	11	21	0.063966	0.41	0.024589	1.413517	33.942498	Australia	-5.004959	Complex hydrogeological structure	Crosbie, R. S., Jolly, I. D., Leaney, F. W., & Petheram, C. (2010). Can the dataset of field based recharge estimates in Australia be used to predict recharge in data-poor areas?. Hydrology and Earth System Sciences, 14(10),
-36.02	146.1	97	95.794046	642.856899	1.485	64	16	20	0.060719	0.40523	0.023622	1.40789	28.534176	Australia	-6.775006	Major groundwater basins	Crosbie, R. S., Jolly, I. D., Leaney, F. W., & Petheram, C. (2010). Can the dataset of field based recharge estimates in Australia be used to predict recharge in data-poor areas?. Hydrology and Earth System Sciences, 14(10),
-36.22	145.27	40	27.372329	481.853448	1.442	66	16	18	0.058981	0.414186	0.02432	1.44125	39.458111	Australia	-2.212558	Major groundwater basins	Crosbie, R. S., Jolly, I. D., Leaney, F. W., & Petheram, C. (2010). Can the dataset of field based recharge estimates in Australia be used to predict recharge in data-poor areas?. Hydrology and Earth System Sciences, 14(10),
-36.05	146.45	107	104.393013	642.856899	1.507	65	17	18	0.056742	0.39614	0.025092	1.414905	28.82974	Australia	-22.384985	Major groundwater basins	Crosbie, R. S., Jolly, I. D., Leaney, F. W., & Petheram, C. (2010). Can the dataset of field based recharge estimates in Australia be used to predict recharge in data-poor areas?. Hydrology and Earth System Sciences, 14(10),
-33.4	145.6	8.5	7.678894	377.618965	1.552	58	10	32	0.072598	0.402044	0.024037	1.26495	15.02897	Australia	-8.560311	Major groundwater basins	Zhang L, Dawes WR, Hatton TJ, Hume IH, O'Connell MG, Mitchell DC, et al. Estimating episodic recharge under different crop/pasture rotations in the Mallee region. Part 2. Recharge control by agronomic practices. Agr Water Manage 1999, 42(2): 237-249.
-36.37	145.4	2.5	19.117118	481.853448	1.478	63	19	18	0.057011	0.40198	0.023533	1.421484	29.676225	Australia	-5.889982	Major groundwater basins	Crosbie, R. S., Jolly, I. D., Leaney, F. W., & Petheram, C. (2010). Can the dataset of field based recharge estimates in Australia be used to predict recharge in data-poor areas?. Hydrology and Earth System Sciences, 14(10),
-34.13	18.91	122	119.158425	611.480546	1.416	65	17	18	0.059245	0.419947	0.023522	1.442925	41.783793	Africa	-8.27039	Complex hydrogeological structure	Sun, X., Xu, Y., Jovanovic, N. Z., Kapangaziwiri, E., Brendonck, L., & Bugan, R. D. H. (2013). Application of the rainfall infiltration breakthrough (RIB) model for groundwater recharge estimation in west coastal South Africa. Water SA, 39(2), 221-230.
-36.3204	140.082	27.5	47.062716	477.887932	1.462	75	7	18	0.063303	0.414981	0.026185	1.514797	57.041634	Australia	-10.818647	Major groundwater basins	Crosbie, R. S., Jolly, I. D., Leaney, F. W., & Petheram, C. (2010). Can the dataset of field based recharge estimates in Australia be used to predict recharge in data-poor areas?. Hydrology and Earth System Sciences, 14(10),
-35.9119	139.753	13	22.494084	436.984483	1.479	73	9	18	0.061462	0.409074	0.026383	1.482772	47.894806	Australia	-19.394217	Major groundwater basins	Crosbie, R. S., Jolly, I. D., Leaney, F. W., & Petheram, C. (2010). Can the dataset of field based recharge estimates in Australia be used to predict recharge in data-poor areas?. Hydrology and Earth System Sciences, 14(10),
-35.8175	139.698	10	20.660625	436.984483	1.467	71	10	19	0.062476	0.412999	0.025598	1.457789	44.03505	Australia	-18.020905	Major groundwater basins	Crosbie, R. S., Jolly, I. D., Leaney, F. W., & Petheram, C. (2010). Can the dataset of field based recharge estimates in Australia be used to predict recharge in data-poor areas?. Hydrology and Earth System Sciences, 14(10),
-35.9184	140.491	4	18.898657	413.400001	1.462	72	8	20	0.064982	0.41644	0.025215	1.458536	46.014196	Australia	-19.668879	Major groundwater basins	Crosbie, R. S., Jolly, I. D., Leaney, F. W., & Petheram, C. (2010). Can the dataset of field based recharge estimates in Australia be used to predict recharge in data-poor areas?. Hydrology and Earth System Sciences, 14(10),
-35.14	142.03	4.3	4.647544	328.872414	1.55	69	9	22	0.063302	0.39218	0.025604	1.370561	25.755484	Australia	-57.87747	Major groundwater basins	Crosbie, R. S., Jolly, I. D., Leaney, F. W., & Petheram, C. (2010). Can the dataset of field based recharge estimates in Australia be used to predict recharge in data-poor areas?. Hydrology and Earth System Sciences, 14(10),
-35.16	140.22	13	10.749091	354.97069	1.596	76	7	17	0.057487	0.373619	0.028725	1.464109	36.305108	Australia	-31.677729	Major groundwater basins	Crosbie, R. S., Jolly, I. D., Leaney, F. W., & Petheram, C. (2010). Can the dataset of field based recharge estimates in Australia be used to predict recharge in data-poor areas?. Hydrology and Earth System Sciences, 14(10),
-35.02	140.05	5	4.721083	354.97069	1.645	74	7	19	0.057217	0.36059	0.029017	1.375283	23.37266	Australia	-16.006714	Major groundwater basins	Crosbie, R. S., Jolly, I. D., Leaney, F. W., & Petheram, C. (2010). Can the dataset of field based recharge estimates in Australia be used to predict recharge in data-poor areas?. Hydrology and Earth System Sciences, 14(10),
-35.66	141.3	19	18.282131	363.358621	1.507	78	7	15	0.058566	0.398798	0.028381	1.590512	65.155745	Australia	-34.760052	Major groundwater basins	Crosbie, R. S., Jolly, I. D., Leaney, F. W., & Petheram, C. (2010). Can the dataset of field based recharge estimates in Australia be used to predict recharge in data-poor areas?. Hydrology and Earth System Sciences, 14(10),
-35.37	139.56	6	5.832285	374.501725	1.498	71	11	18	0.059692	0.40259	0.026508	1.454474	39.972818	Australia	-13.839933	Major groundwater basins	Crosbie, R. S., Jolly, I. D., Leaney, F. W., & Petheram, C. (2010). Can the dataset of field based recharge estimates in Australia be used to predict recharge in data-poor areas?. Hydrology and Earth System Sciences, 14(10),
-36.71	140.55	60	62.745961	522.846552	1.47	74	7	19	0.064228	0.413561	0.025732	1.487358	50.768193	Australia	-10.513466	Major groundwater basins	Crosbie, R. S., Jolly, I. D., Leaney, F. W., & Petheram, C. (2010). Can the dataset of field based recharge estimates in Australia be used to predict recharge in data-poor areas?. Hydrology and Earth System Sciences, 14(10),
-36.56	140.74	60	71.223414	522.846552	1.475	76	8	16	0.059809	0.408793	0.027597	1.549183	61.828942	Australia	-15.808347	Major groundwater basins	Crosbie, R. S., Jolly, I. D., Leaney, F. W., & Petheram, C. (2010). Can the dataset of field based recharge estimates in Australia be used to predict recharge in data-poor areas?. Hydrology and Earth System Sciences, 14(10),
-35.63	141.2	1.5	10.756933	363.358621	1.51	78	6	16	0.060442	0.399144	0.02749	1.574657	61.694767	Australia	-39.169909	Major groundwater basins	Crosbie, R. S., Jolly, I. D., Leaney, F. W., & Petheram, C. (2010). Can the dataset of field based recharge estimates in Australia be used to predict recharge in data-poor areas?. Hydrology and Earth System Sciences, 14(10),
-35.1	142.1	3.5	3.160127	328.872414	1.634	72	8	20	0.057971	0.364949	0.028524	1.353022	21.204755	Australia	-24.689097	Major groundwater basins	Allison GB, Hughes MW. The Use of Natural Tracers as Indicators of Soil-Water Movement in a Temperate Semi-Arid Region. J Hydrol 1983, 60(1-4): 157-173.
-36.3	140.8	10	24.703846	444.577587	1.463	71	8	21	0.066096	0.417126	0.024807	1.439621	42.647479	Australia	-22.61387	Major groundwater basins	Allison GB, Cook PG, Barnett SR, Walker GR, Jolly ID, Hughes MW. Land clearance and river salinisation in the western Murray Basin, Australia. J Hydrol 1990, 119(1): 1-20.
-36.23	139.98	40	39.237599	494.237931	1.455	74	7	19	0.06466	0.41798	0.025643	1.492671	53.832485	Australia	-7.553216	Major groundwater basins	Crosbie, R. S., Jolly, I. D., Leaney, F. W., & Petheram, C. (2010). Can the dataset of field based recharge estimates in Australia be used to predict recharge in data-poor areas?. Hydrology and Earth System Sciences, 14(10),
-35.1	140.3	0.8	6.355801	354.97069	1.659	76	8	16	0.053219	0.35346	0.03151	1.428543	28.545017	Australia	-36.881056	Major groundwater basins	Allison GB, Cook PG, Barnett SR, Walker GR, Jolly ID, Hughes MW. Land clearance and river salinisation in the western Murray Basin, Australia. J Hydrol 1990, 119(1): 1-20.
-36.4665	140.495	24	44.995726	477.887932	1.422	76	7	17	0.063033	0.425748	0.026643	1.549899	72.06866	Australia	-24.093996	Major groundwater basins	Crosbie, R. S., Jolly, I. D., Leaney, F. W., & Petheram, C. (2010). Can the dataset of field based recharge estimates in Australia be used to predict recharge in data-poor areas?. Hydrology and Earth System Sciences, 14(10),
-36.2587	140.799	25	26.353399	444.577587	1.469	74	7	19	0.064258	0.413857	0.025725	1.487741	50.968853	Australia	-25.879301	Major groundwater basins	Crosbie, R. S., Jolly, I. D., Leaney, F. W., & Petheram, C. (2010). Can the dataset of field based recharge estimates in Australia be used to predict recharge in data-poor areas?. Hydrology and Earth System Sciences, 14(10),
-35.8	141.4	3.5	5.396281	363.358621	1.393	73	7	20	0.067354	0.436987	0.02508	1.484795	63.044087	Australia	-20.767529	Major groundwater basins	Kennett-Smith A, Budd G, Cook P, Walker G. The effect of lucerne on the recharge to cleared mallee lands. The Centre for Groundwater Studies: Report; 1990.
-35.3	140.8	12	7.475719	327.487932	1.693	74	7	19	0.055162	0.346263	0.030413	1.343405	18.365818	Australia	-42.938888	Major groundwater basins	Leaney, F. W. J., and A. L. Herczeg. The origin of fresh groundwater in the SW Murray Basin and its potential for salinisation. CSIRO Land and Water, 1999.
-35.3	140.9	0.3	3.452085	327.487932	1.703	74	7	19	0.054761	0.343341	0.0307	1.337464	17.445813	Australia	-44.876783	Major groundwater basins	Leaney, F. W. J., and A. L. Herczeg. The origin of fresh groundwater in the SW Murray Basin and its potential for salinisation. CSIRO Land and Water, 1999.
-36.437	140.924	23	23.172407	444.577587	1.422	65	7	28	0.075154	0.436506	0.023335	1.361018	36.886106	Australia	-22.064546	Major groundwater basins	Crosbie, R. S., Jolly, I. D., Leaney, F. W., & Petheram, C. (2010). Can the dataset of field based recharge estimates in Australia be used to predict recharge in data-poor areas?. Hydrology and Earth System Sciences, 14(10),
-35.1	140.1	13	11.581947	354.97069	1.658	76	8	16	0.053258	0.35376	0.031478	1.429301	28.679933	Australia	-34.103914	Major groundwater basins	Allison GB, Cook PG, Barnett SR, Walker GR, Jolly ID, Hughes MW. Land clearance and river salinisation in the western Murray Basin, Australia. J Hydrol 1990, 119(1): 1-20.
-35.1	139.3	1	5.56363	410.293105	1.355	61	15	24	0.070351	0.445674	0.020904	1.412154	40.156579	Australia	-0.122072	Major groundwater basins	Unkovich M, Blott K, Knight A, Mock I, Rab A, Portelli M. Water use, competition, and crop production in low rainfall, alley farming systems of south-eastern Australia. Aust J Agr Res 2003, 54(8): 751-762.
-35.4	139.6	13	7.420439	374.501725	1.336	65	12	23	0.070165	0.452275	0.022529	1.423576	52.354101	Australia	-8.163577	Major groundwater basins	Walker GR, Dillon J, Pavelic P, Kennett-Smigh AK. Preliminary results of recharge and discharge investigations at Cooke Plains, South Australia. Ctr for Groundwater Stud, Adelaide, SA, Australia 1992.
-35.1	141.9	2.5	2.755482	319.558621	1.664	73	7	20	0.057231	0.355871	0.029142	1.341184	19.260345	Australia	-21.744106	Major groundwater basins	Allison GB, Cook PG, Barnett SR, Walker GR, Jolly ID, Hughes MW. Land clearance and river salinisation in the western Murray Basin, Australia. J Hydrol 1990, 119(1): 1-20.
-35.9868	140.27	24	19.818772	413.400001	1.474	72	11	17	0.059094	0.40836	0.026883	1.48267	47.901122	Asia	0	Major groundwater basins	Crosbie, R. S., Jolly, I. D., Leaney, F. W., & Petheram, C. (2010). Can the dataset of field based recharge estimates in Australia be used to predict recharge in data-poor areas?. Hydrology and Earth System Sciences, 14(10),
-36.1983	140.305	22	32.6331	477.887932	1.469	68	11	21	0.064437	0.413967	0.024413	1.419454	36.04179	Australia	-13.56527	Major groundwater basins	Crosbie, R. S., Jolly, I. D., Leaney, F. W., & Petheram, C. (2010). Can the dataset of field based recharge estimates in Australia be used to predict recharge in data-poor areas?. Hydrology and Earth System Sciences, 14(10),
-36.2406	140.44	64	51.842672	477.887932	1.461	72	10	18	0.061361	0.41369	0.026147	1.478163	48.816088	Australia	-12.024109	Major groundwater basins	Crosbie, R. S., Jolly, I. D., Leaney, F. W., & Petheram, C. (2010). Can the dataset of field based recharge estimates in Australia be used to predict recharge in data-poor areas?. Hydrology and Earth System Sciences, 14(10),
-35.88	140.05	10	10.027401	413.400001	1.458	65	11	24	0.068418	0.420314	0.023183	1.386786	31.498883	Australia	-14.236667	Major groundwater basins	Crosbie, R. S., Jolly, I. D., Leaney, F. W., & Petheram, C. (2010). Can the dataset of field based recharge estimates in Australia be used to predict recharge in data-poor areas?. Hydrology and Earth System Sciences, 14(10),
-36.4469	145.711	28	44.362338	547.705172	1.494	60	17	23	0.064338	0.405871	0.021818	1.377865	21.362258	Australia	-5.737392	Complex hydrogeological structure	Crosbie, R. S., Jolly, I. D., Leaney, F. W., & Petheram, C. (2010). Can the dataset of field based recharge estimates in Australia be used to predict recharge in data-poor areas?. Hydrology and Earth System Sciences, 14(10),
-36.4356	145.712	14.7	41.603015	547.705172	1.478	62	17	21	0.062109	0.407596	0.02249	1.400769	26.161717	Australia	-4.638743	Complex hydrogeological structure	Crosbie, R. S., Jolly, I. D., Leaney, F. W., & Petheram, C. (2010). Can the dataset of field based recharge estimates in Australia be used to predict recharge in data-poor areas?. Hydrology and Earth System Sciences, 14(10),
-36.4852	145.634	22.5	48.604824	547.705172	1.512	63	17	20	0.059488	0.397269	0.023752	1.393748	24.233888	Australia	-15.381094	Complex hydrogeological structure	Crosbie, R. S., Jolly, I. D., Leaney, F. W., & Petheram, C. (2010). Can the dataset of field based recharge estimates in Australia be used to predict recharge in data-poor areas?. Hydrology and Earth System Sciences, 14(10),
-37.23	140.7	115	114.260709	616.194829	1.274	68	10	22	0.07057	0.470261	0.023833	1.437263	74.899904	Australia	-9.796292	Major groundwater basins	Crosbie, R. S., Jolly, I. D., Leaney, F. W., & Petheram, C. (2010). Can the dataset of field based recharge estimates in Australia be used to predict recharge in data-poor areas?. Hydrology and Earth System Sciences, 14(10),
-37.06	140.66	80	102.185341	616.194829	1.402	66	13	21	0.065534	0.431118	0.023226	1.431045	43.307505	Australia	-8.606088	Major groundwater basins	Crosbie, R. S., Jolly, I. D., Leaney, F. W., & Petheram, C. (2010). Can the dataset of field based recharge estimates in Australia be used to predict recharge in data-poor areas?. Hydrology and Earth System Sciences, 14(10),
-37.2361	140.959	140	119.145869	616.194829	1.207	74	10	16	0.061978	0.482842	0.028088	1.481636	129.117042	Australia	-23.071641	Major groundwater basins	Crosbie, R. S., Jolly, I. D., Leaney, F. W., & Petheram, C. (2010). Can the dataset of field based recharge estimates in Australia be used to predict recharge in data-poor areas?. Hydrology and Earth System Sciences, 14(10),
11.45	43.1	5	1.408591	189.038186	1.392	52	28	20	0.061524	0.416155	0.015329	1.454534	23.254848	Africa	-107.743954	Complex hydrogeological structure	Verhagen BTh, Geyh MA, Frohlich K, Wirth K. 1991. Isotope Hydrogeological methods for the quantitative evaluation of groundwater resources in arid areas: a development of a methodology, Report for Federal Ministry for Economic Cooperation, pp149.
13.68	39.2	104.5	92.845333	588.543414	1.422	43	27	30	0.076636	0.429168	0.014598	1.405729	11.2909	Africa	-5.050736	Complex hydrogeological structure	Vandecasteele I, Nyssen J, et al. 2011. Hydrogeology and groundwater flow in a basalt‐capped Mesozoic sedimentary series of the Ethiopian highlands. Hydrogeology Journal 19: 641– 650.
30.44	-9.02	14	6.053043	198.637062	1.504	47	24	29	0.071751	0.407598	0.016936	1.360638	9.542998	Africa	-47.516594	Major groundwater basins	Bouchaou, Michelot, Vengosh et al. (2008) Application of multiple isotopic and geochemical tracers for investigation of recharge, salinization and residence time of water in the Souss-Massa aquifer, southwest of Morocco, J. of Hydrol., 352; 267-287.
16.7	-3.02	13	1.854032	180.6314	1.551	77	12	11	0.048785	0.379482	0.034106	1.596136	62.066622	Africa	-14.435035	Major groundwater basins	Fontes JC, Gasse F, Andrews JN. 1993. Climatic conditions of Holocene groundwate recharge in the Sahel Zone of Africa, IAEA Conference proceedings paper, pp20.
34.9	8.1	0.9	8.494589	297.748276	1.455	55	27	18	0.056254	0.398897	0.018077	1.435203	22.492555	Africa	-56.260014	Complex hydrogeological structure	Zouari K, Maliki MA, Moumni M, Aranyossy JF. Chemical (Cl) and isotopic (18O, 2H, 3H) study of the unsaturated zone in the arid region of Nefta (South Tunisia). In WM Edmunds (ed) Isotope based assessment of groundwater renewal in water scarce regions 20
13.25	11	44	42.213644	398.714671	1.493	83	12	5	0.044117	0.388454	0.039194	1.956863	165.142789	Africa	-26.932174	Major groundwater basins	Edmunds, Fellman & Goni (1999) Lakes, groundwater and palaeohydrology in the Sahel of NE Nigeria: evidence from hydrochemistry, J. of Geol Soc London, 156; 345-355.
12.81	10.45	14	22.526161	509.306427	1.474	57	19	24	0.066155	0.41116	0.020141	1.383066	19.815707	Africa	-27.328908	Major groundwater basins	Eilers, WHM, Carter RC and Rushton KR (2007) A single layer soil water balance model for estimating deep drainage (potential recharge): An application to cropped land in semi-arid NE Nigera, Geoderma, 140; 119-131.
11.5	13	43	75.830029	613.350073	1.517	60	24	16	0.051324	0.384298	0.023389	1.411842	23.857529	Africa	-25.909819	Major groundwater basins	Edmunds, Fellman, Goni and Prudhomme (2002) Spatial and temporal distribution of gw recharge in northern Nigeria, Hydrogeology Journal, 10; 205-215.
-33.36	21.3	12.5	2.201968	261.556551	1.484	66	21	13	0.048077	0.391571	0.027934	1.45062	40.015681	Africa	-16.754406	local and shallow aquifers	Wang, Lei, Brighid O Dochartaigh, and David Macdonald. "A literature review of recharge estimation and groundwater resource assessment in Africa." (2010).
-20	18	80	108.200343	535.644402	1.531	80	10	10	0.049838	0.38526	0.033965	1.713298	88.147978	Africa	-34.31754	Major groundwater basins	Klock, H. (2002). Hydrogeology of the Kalahari in North-eastern Namibia: With Special Emphasis on Groundwater Recharge, Flow Modelling and Hydrochemistry (Doctoral dissertation, Selbstverlag Lehr-und Forschungsbereich Hydrogeologie).
-27.24	22.83	29	20.765955	337.560699	1.65	83	5	12	0.05298	0.352244	0.031655	1.695041	66.058098	Africa	-30.853742	Complex hydrogeological structure	Verhagen Bth, Smith PE, McGeorge I, Dziembowski Z. 1978. Tritium profiles in Kalahari Sands as a measure of rain-water recharge. IAEA conference proceedings paper, pp20.
